# Supplementary material for: Controlling stereoselectivity of solid-state photoreactions by co-crystal formation
Source: Royal Society of Chemistry journal article supplement (doi:10.1039/c1cc13484a), 2011-01-01
Supplement: c1cc13484a.pdf [file c1cc13484a.pdf]

**- Supplementary Information -**

# **Controlling stereoselectivity of solid-state photoreactions by co-crystal formation**

Ryo Sekiya and Reiko Kuroda<sup>\*</sup>

*Department of Life Sciences, Graduate School of Arts and Sciences, The University of Tokyo, 3-8-1*

*Komaba, Meguro-ku, Tokyo 153-8902, Japan*

E-mail: ckuroda@mail.ecc.u-tokyo.ac.jp

# Contents

## Experimental Section

|                                                              |             |
|--------------------------------------------------------------|-------------|
| • Materials and instruments                                  | ..... S3    |
| • X-ray crystallography                                      | ..... S3    |
| • Stereochemistry                                            | ..... S4    |
| • Experimental procedure of the photochemical reactions      | ..... S4    |
| • <b>Table S1</b> Crystallographic parameters                | ..... S5–S6 |
| • Physical properties of <b>1</b> , <b>2</b> and <b>3</b>    | ..... S7    |
| • Physical properties of <b>1t</b> , <b>2t</b> and <b>3t</b> | ..... S8    |
| • Physical properties of <b>1c</b> , <b>2c</b> and <b>3c</b> | ..... S9    |

## Supporting Figures

|                                                                                                                                                                  |           |
|------------------------------------------------------------------------------------------------------------------------------------------------------------------|-----------|
| • <b>Fig. S1.</b> Typical UV/vis absorption spectra of the reactant ( <b>1</b> ), the <i>trans</i> isomer ( <b>1t</b> ) and the <i>cis</i> isomer ( <b>1c</b> ). | ..... S10 |
| • <b>Fig. S2</b> The change of IR spectra of <b>X(3)</b> in a KCl disk upon UV irradiation                                                                       | ..... S10 |
| • <b>Fig. S3</b> Typical <sup>1</sup> H NMR spectra of the <i>trans</i> isomer ( <b>3t</b> ) and the <i>cis</i> isomer ( <b>3c</b> )                             | ..... S11 |
| • <b>Fig. S4</b> ORTEP drawing of <b>1t</b>                                                                                                                      | ..... S11 |
| • <b>Fig. S5</b> ORTEP drawing of <b>3c</b>                                                                                                                      | ..... S12 |
| • <b>Fig. S6</b> ORTEP drawing of <b>1</b>                                                                                                                       | ..... S12 |
| • <b>Fig. S7</b> ORTEP drawing of <b>2</b>                                                                                                                       | ..... S13 |
| • <b>Fig. S8</b> ORTEP drawing of <b>3</b>                                                                                                                       | ..... S13 |
| • <b>Fig. S9</b> <sup>1</sup> H NMR spectra of the photochemical reaction products of <b>1–3</b> in degassed benzene solution.                                   | ..... S14 |
| • <b>Fig. S10</b> Intermolecular carbonyl-Br (a) and carbonyl-Me (b) contacts found in <b>X(3)</b> and <b>X<sub>3</sub>(1:3=1:9)</b> , respectively.             | ..... S14 |
| • <b>Fig. S11</b> <sup>1</sup> H NMR spectra of the photochemical reaction products of <b>X<sub>3</sub>(1:3=9:1)</b> and <b>X<sub>3</sub>(2:3=1:1)</b>           | ..... S15 |
| • <b>References</b>                                                                                                                                              | ..... S15 |

## Materials and instruments.

All chemicals and solvents were purchased from Kanto Chemical Co., Ltd., Wako Pure Chemical Co., Ltd., and Tokyo Kasei Kogyo Co., Ltd., and were used without further purification. Compounds **1–3** were synthesized according to procedures reported by Schultz et.al.<sup>1</sup> Melting points were measured on Yanaco Micro Melting Point Apparatus 3120. <sup>1</sup>H NMR (500MHz) and <sup>13</sup>C NMR (125 MHz) spectra were recorded on a JEOL  $\alpha$ -500 spectrometer. In addition to CHCl<sub>3</sub> in CDCl<sub>3</sub> solution, fluorene was selected as the internal standard (see Fig. S8c) because its methylene singlet peak at 3.8 ppm does not overlap with other relevant peaks. The chemical shift values reported here are with respect to an external tetramethylsilane (TMS) standard. IR data were recorded on a JASCO FT/IR-350 spectrometer. EI-MS was acquired on JEOL JMS-600H MSroute.

## X-ray crystallography.

X-ray crystallographic data of **X(1)**, **X(2)**, **X(3)**, **X<sub>3</sub>(1:3=1:1)** and **3c** were collected on a Bruker SMART APEX CCD diffractometer using graphite-monochromatized Mo K $\alpha$  radiation ( $\lambda = 0.71073 \text{ \AA}$ ) at 103 K. X-ray crystallographic data of **X<sub>3</sub>(2:3=1:1)**, **X<sub>3</sub>(1:3=9:1)** and **1t** were collected on a Rigaku RAXIS-RAPID imaging plate area detector using graphite-monochromatized Mo K $\alpha$  radiation ( $\lambda = 0.71073 \text{ \AA}$ ) at 153 K or 103 K. Crystallographic parameters are summarized in Table S1. The crystal structures were solved by the direct method using *SHELXS-97* program and refined by the successive differential Fourier syntheses and full-matrix least-squares procedure using *SHELXL-97* program.<sup>2</sup> Anisotropic thermal factors were applied to all non-hydrogen atoms. All hydrogen atoms were generated geometrically. The occupancy factors of the disordered atoms in **X<sub>3</sub>(2:3=1:1)** and **X<sub>3</sub>(1:3=9:1)** were fixed to 0.5:0.5 and 0.9:0.1, respectively. The occupancy factors of the disordered atoms in **X<sub>3</sub>(1:3=1:1)** were estimated by *SHELXL-97* program.<sup>2</sup> Computer graphics of ORTEP drawing of the X-ray crystal structures were portrayed with Mercury 2.3 program.<sup>3</sup>

### Stereochemistry.

The stereochemistry of the photochemical reaction products (the *trans* and the *cis* isomers) were determined by single crystal X-ray diffraction analysis. Crystal and molecular structures of **1t** (*trans* isomer) and **3c** (*cis* isomer) are shown in Fig. S4 and S5, respectively. They are representatives of the *trans* isomers (**1t**, **2t**, and **3t**) and the *cis* isomers (**1c**, **2c**, and **3c**).

### Experimental procedure of the photochemical reactions.

A single crystal of a reactant (ca. 1.6~2 mg) was stored in a NMR sampling tube (KUSANO SCIENCE Corp., hard glass,  $\phi$ 5 mm). The NMR sampling tube was degassed and then filled with dry argon (this process was repeated three times). The single crystal was irradiated at 365 nm with SPOT CURE SP-V (USHIO SCIENCE Corp.) using a cut-filter ( $\lambda < 350$  nm). After irradiation, the sample was dissolved in  $\text{CDCl}_3$  and then subjected to  $^1\text{H}$  NMR measurement.

**Table S1** Crystallographic parameters

| Crystal                                       | <b>X(1)</b>                            | <b>X(2)</b>                            | <b>X(3)</b>                            | <b>X<sub>3</sub>(2:3=1:1)</b>                                         |
|-----------------------------------------------|----------------------------------------|----------------------------------------|----------------------------------------|-----------------------------------------------------------------------|
| Compound                                      | <b>1</b>                               | <b>2</b>                               | <b>3</b>                               | <b>2 + 3</b>                                                          |
| Ratio                                         | -                                      | -                                      | -                                      | <b>2 : 3 = 0.52 : 0.48</b>                                            |
| Formula                                       | C <sub>14</sub> H <sub>16</sub> OS     | C <sub>13</sub> H <sub>13</sub> OSCl   | C <sub>13</sub> H <sub>13</sub> OSBr   | C <sub>13</sub> H <sub>13</sub> OSCl <sub>0.5</sub> Br <sub>0.5</sub> |
| Formula weight                                | 232.3                                  | 252.7                                  | 297.2                                  | 275.0                                                                 |
| Crystal system                                | Triclinic                              | Orthorhombic                           | Orthorhombic                           | Orthorhombic                                                          |
| Space group                                   | <i>P</i> $\bar{1}$ (#2)                | <i>Pbca</i> (#61)                      | <i>Pbca</i> (#61)                      | <i>Pbca</i> (#61)                                                     |
| <i>a</i> / Å                                  | 7.923(2)                               | 15.596(3)                              | 15.730(5)                              | 15.8902(4)                                                            |
| <i>b</i> / Å                                  | 10.418(2)                              | 14.935(3)                              | 15.142(5)                              | 15.2239(3)                                                            |
| <i>c</i> / Å                                  | 15.473(3)                              | 20.531(4)                              | 20.590(6)                              | 20.6540(5)                                                            |
| $\alpha$ / °                                  | 91.07 (3)                              | 90                                     | 90                                     | 90                                                                    |
| $\beta$ / °                                   | 102.32(3)                              | 90                                     | 90                                     | 90                                                                    |
| $\gamma$ / °                                  | 104.43(3)                              | 90                                     | 90                                     | 90                                                                    |
| <i>V</i> / Å <sup>3</sup>                     | 1204.9(4)                              | 4782.2(2)                              | 4904(3)                                | 4996.4(2)                                                             |
| <i>D</i> <sub>calc.</sub> /g cm <sup>-3</sup> | 1.28                                   | 1.40                                   | 1.61                                   | 1.46                                                                  |
| <i>Z</i>                                      | 4                                      | 16                                     | 16                                     | 16                                                                    |
| $2\theta_{\max}$ /°                           | 55.6                                   | 55.8                                   | 55.8                                   | 54.8                                                                  |
| $\mu$ (MoK $\alpha$ )/mm <sup>-1</sup>        | 0.244                                  | 0.468                                  | 3.498                                  | 1.941                                                                 |
| Temperature /K                                | 103                                    | 103                                    | 103                                    | 153                                                                   |
| Crystal form                                  | block                                  | block                                  | block                                  | block                                                                 |
| Crystal size /mm                              | 0.40×0.35×0.20                         | 0.40×0.40×0.20                         | 0.40×0.40×0.20                         | 0.60 × 0.52 × 0.42                                                    |
| Crystal colourless                            | colourless                             | colourless                             | colourless                             | colourless                                                            |
| <i>h</i> range                                | -9 → 10                                | -20 → 20                               | -11 → 20                               | 0 → 20                                                                |
| <i>k</i> range                                | -10 → 13                               | -19 → 19                               | -19 → 16                               | 0 → 19                                                                |
| <i>l</i> range                                | -20 → 14                               | -26 → 26                               | -26 → 25                               | -26 → 0                                                               |
| # of total reflections                        | 7394                                   | 39673                                  | 28443                                  | 43366                                                                 |
| # of unique reflections                       | 5205                                   | 5630                                   | 5696                                   | 5653                                                                  |
| # of observed reflections                     | 4521                                   | 4938                                   | 4446                                   | 2699                                                                  |
| <i>R</i> <sub>int</sub>                       | 0.0230                                 | 0.0412                                 | 0.0461                                 | 0.0406                                                                |
| Criterion for observed reflections            | <i>I</i> > 2σ( <i>F</i> <sub>o</sub> )                                |
| X-ray apparatus                               | SMART-CCD                              | SMART-CCD                              | SMART-CCD                              | Rigaku-IP                                                             |
| <i>R</i> 1 (observed)                         | 0.0423                                 | 0.0393                                 | 0.0345                                 | 0.0413                                                                |
| <i>wR</i> 2 (observed)                        | 0.1066                                 | 0.0930                                 | 0.0771                                 | 0.0969                                                                |
| <i>G. O. F.</i>                               | 1.035                                  | 1.063                                  | 1.014                                  | 0.815                                                                 |
| # of parameters used                          | 293                                    | 291                                    | 291                                    | 309                                                                   |
| $\Delta\rho_{\max}$ (eÅ <sup>-3</sup> )       | +0.403                                 | +0.452                                 | +0.754                                 | +0.360                                                                |
| $\Delta\rho_{\min}$ (eÅ <sup>-3</sup> )       | -0.282                                 | -0.323                                 | -0.627                                 | -0.297                                                                |
| CCDC number                                   | 679703                                 | 679704                                 | 679705                                 | 679709                                                                |

**Table S1** Crystallographic parameters (continued)

| Crystal                                       | <b>X<sub>3</sub>(1:3=1:1)</b>                                                          | <b>X<sub>3</sub>(1:3=9:1)</b>                           | -                                      | -                                      |
|-----------------------------------------------|----------------------------------------------------------------------------------------|---------------------------------------------------------|----------------------------------------|----------------------------------------|
| Compound                                      | <b>1 + 3</b>                                                                           | <b>1 + 3</b>                                            | <b>1t</b>                              | <b>3c</b>                              |
| Ratio                                         | <b>1 : 3 = 0.49 : 0.51</b>                                                             | <b>1 : 3 = 0.9 : 0.1</b>                                | -                                      | -                                      |
| Formula                                       | C <sub>27.18</sub> H <sub>29.54</sub> O <sub>2</sub> S <sub>2</sub> Br <sub>0.82</sub> | C <sub>13.9</sub> H <sub>15.7</sub> OSBr <sub>0.1</sub> | C <sub>14</sub> H <sub>16</sub> OS     | C <sub>13</sub> H <sub>13</sub> OSBr   |
| Formula weight                                | 517.8                                                                                  | 238.8                                                   | 232.3                                  | 297.2                                  |
| Crystal system                                | Orthorhombic                                                                           | Orthorhombic                                            | Monoclinic                             | Monoclinic                             |
| Space group                                   | <i>Pbca</i> (#61)                                                                      | <i>Pbca</i> (#61)                                       | <i>P2<sub>1</sub>/n</i> (#14)          | <i>P2<sub>1</sub>/n</i> (#14)          |
| <i>a</i> / Å                                  | 15.591(3)                                                                              | 15.5798(4)                                              | 6.9911(2)                              | 9.607(2)                               |
| <i>b</i> / Å                                  | 15.064(3)                                                                              | 15.0633(4)                                              | 17.8652(4)                             | 7.577(2)                               |
| <i>c</i> / Å                                  | 20.669(4)                                                                              | 20.6424(5)                                              | 9.4401(2)                              | 17.375(4)                              |
| $\alpha$ / °                                  | 90                                                                                     | 90                                                      | 90                                     | 90                                     |
| $\beta$ / °                                   | 90                                                                                     | 90                                                      | 96.020(1)                              | 103.40(3)                              |
| $\gamma$ / °                                  | 90                                                                                     | 90                                                      | 90                                     | 90                                     |
| <i>V</i> / Å <sup>3</sup>                     | 4854.4(2)                                                                              | 4844.4(2)                                               | 1172.54(5)                             | 1230.3(4)                              |
| <i>D</i> <sub>calc.</sub> /g cm <sup>-3</sup> | 1.42                                                                                   | 1.32                                                    | 1.32                                   | 1.60                                   |
| <i>Z</i>                                      | 8                                                                                      | 16                                                      | 4                                      | 4                                      |
| $2\theta_{\max}$ /°                           | 55.8                                                                                   | 59.8                                                    | 59.8                                   | 55.8                                   |
| $\mu$ (MoK $\alpha$ )/mm <sup>-1</sup>        | 1.590                                                                                  | 0.573                                                   | 0.251                                  | 3.486                                  |
| Temperature /K                                | 103                                                                                    | 103                                                     | 153                                    | 103                                    |
| Crystal form                                  | plate                                                                                  | block                                                   | block                                  | block                                  |
| Crystal size /mm                              | 0.20×0.20×0.05                                                                         | 0.52×0.50×0.46                                          | 0.25×0.25×0.05                         | 0.40×0.10×0.10                         |
| Crystal colourless                            | colourless                                                                             | colourless                                              | colourless                             | colourless                             |
| <i>h</i> range                                | -20 → 20                                                                               | -20 → 21                                                | 0 → 9                                  | -12 → 12                               |
| <i>k</i> range                                | -19 → 19                                                                               | -21 → 21                                                | 0 → 25                                 | -9 → 9                                 |
| <i>l</i> range                                | -26 → 26                                                                               | -28 → 28                                                | -13 → 13                               | -22 → 22                               |
| # of total reflections                        | 40034                                                                                  | 53767                                                   | 13602                                  | 10251                                  |
| # of unique reflections                       | 5714                                                                                   | 6998                                                    | 3385                                   | 2840                                   |
| # of observed reflections                     | 4730                                                                                   | 5748                                                    | 2475                                   | 2553                                   |
| <i>R</i> <sub>int</sub>                       | 0.0502                                                                                 | 0.0551                                                  | 0.0331                                 | 0.0387                                 |
| Criterion for observed reflections            | <i>I</i> > 2σ( <i>F</i> <sub>o</sub> )                                                 | <i>I</i> > 2σ( <i>F</i> <sub>o</sub> )                  | <i>I</i> > 2σ( <i>F</i> <sub>o</sub> ) | <i>I</i> > 2σ( <i>F</i> <sub>o</sub> ) |
| X-ray apparatus                               | SMART-CCD                                                                              | Rigaku-IP                                               | Rigaku-IP                              | SMART-CCD                              |
| <i>R</i> 1 (observed)                         | 0.0464                                                                                 | 0.0517                                                  | 0.0380                                 | 0.0317                                 |
| <i>wR</i> 2 (observed)                        | 0.1092                                                                                 | 0.1215                                                  | 0.0923                                 | 0.0793                                 |
| <i>G. O. F.</i>                               | 1.112                                                                                  | 1.193                                                   | 1.003                                  | 1.066                                  |
| # of parameters used                          | 301                                                                                    | 299                                                     | 146                                    | 145                                    |
| $\Delta\rho_{\max}$ (eÅ <sup>-3</sup> )       | +0.520                                                                                 | +1.461                                                  | +0.491                                 | +0.923                                 |
| $\Delta\rho_{\min}$ (eÅ <sup>-3</sup> )       | -0.318                                                                                 | -1.142                                                  | -0.282                                 | -0.351                                 |
| CCDC number                                   | 679710                                                                                 | 801654                                                  | 679706                                 | 679707                                 |

**Physical properties of 2-(2-methylphenylthio)-3-methyl-2-cyclohexene-1-one (1)**

$^1\text{H}$  NMR (500 MHz,  $\text{CDCl}_3$ ): 2.06 (m, 2H), 2.23 (s, 3H), 2.41 (s, 3H), 2.56 (t,  $J = 6.2$  Hz, 2H), 2.62 (t,  $J = 6.0$  Hz, 2H), 6.79 (m, 1H), 7.01 (m, 2H), 7.11 (m, 1H);  $^{13}\text{C}$  NMR (125 MHz,  $\text{CDCl}_3$ ): 20.3, 21.9, 24.5, 24.5, 34.4, 38.4, 124.9, 125.7, 126.1, 129.4, 130.0, 135.6, 169.3, 194.3; MS (EI, 70 eV,  $m/z$ ): 232 ( $\text{M}^+$ ); Elemental Analysis calcd. for  $\text{C}_{14}\text{H}_{16}\text{OS}$ : C, 72.37; H, 6.94; N, 0. Found: C, 72.40; H, 7.07; N, 0.; Melting Point: 103.0 – 103.5  $^\circ\text{C}$ .

**Physical properties of 2-(2-chlorophenylthio)-3-methyl-2-cyclohexene-1-one (2)**

$^1\text{H}$  NMR (500 MHz,  $\text{CDCl}_3$ ): 2.08 (m, 2H), 2.27 (s, 3H), 2.59 (t,  $J = 6.4$  Hz, 2H), 2.65 (t,  $J = 6.1$  Hz, 2H), 6.82 (dd,  $J = 1.5, 7.9$  Hz, 1H), 7.03 (ddd,  $J = 1.5, 7.6, 7.9$  Hz, 1H), 7.08 (ddd,  $J = 1.2, 7.6, 7.9$  Hz, 1H), 7.31 (dd,  $J = 1.2, 7.9$  Hz, 1H);  $^{13}\text{C}$  NMR (125 MHz,  $\text{CDCl}_3$ ): 21.7, 24.4, 34.4, 38.2, 126.0, 126.9, 127.0, 129.5, 129.6, 131.9, 135.7, 170.7, 194.1; MS (EI, 70 eV,  $m/z$ ): 254 ( $\text{M}^+$ ,  $^{37}\text{Cl}$ ), 252 ( $\text{M}^+$ ,  $^{35}\text{Cl}$ ); Elemental Analysis calcd. for  $\text{C}_{13}\text{H}_{13}\text{OSCl}$ : C, 61.77; H, 5.18; N, 0. Found: C, 61.70; H, 5.30; N, 0.; Melting Point: 94.0 – 95.0  $^\circ\text{C}$ .

**Physical properties of 2-(2-bromophenylthio)-3-methyl-2-cyclohexene-1-one (3)**

$^1\text{H}$  NMR (500 MHz,  $\text{CDCl}_3$ ): 2.09 (m, 2H), 2.26 (s, 3H), 2.59 (t,  $J = 6.7$  Hz, 2H), 2.65 (t,  $J = 6.1$  Hz, 2H), 6.78 (dd,  $J = 1.5, 7.9$  Hz, 1H), 6.95 (ddd,  $J = 1.5, 7.3, 7.9$  Hz, 1H), 7.12 (ddd,  $J = 1.2, 7.3, 7.9$  Hz, 1H), 7.48 (dd,  $J = 1.2, 7.9$  Hz, 1H);  $^{13}\text{C}$  NMR (125 MHz,  $\text{CDCl}_3$ ): 21.7, 24.5, 34.4, 38.2, 121.5, 126.1, 126.7, 127.5, 128.9, 132.9, 137.7, 170.8, 194.1; MS (EI, 70 eV,  $m/z$ ): 298 ( $\text{M}^+$ ,  $^{81}\text{Br}$ ), 296 ( $\text{M}^+$ ,  $^{79}\text{Br}$ ); Elemental Analysis calcd. for  $\text{C}_{13}\text{H}_{13}\text{OSBr}$ : C, 52.54; H, 4.41; N, 0. Found: C, 52.60; H, 4.47; N, 0.; Melting Point: 99.0 – 100.0  $^\circ\text{C}$ .

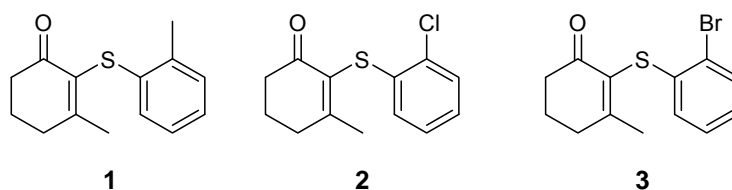

**Physical properties of *trans*-6,9b-dimethyl-2,3,4a,9b-tetrahydro-1*H*-dibenzothiophene-4-one (1t)**

$^1\text{H}$  NMR (500 MHz,  $\text{CDCl}_3$ ): 1.13 (s, 3H), 2.06 (m, 1H), 2.17 (m, 1H), 2.24 (m, 1H), 2.27 (s, 3H), 2.37 (m, 1H), 2.45 (m, 1H), 2.54 (m, 1H), 4.61 (s, 1H), 6.90 (d,  $J = 7.3$  Hz, 1H), 6.99 (d,  $J = 7.3$  Hz, 1H), 7.04 (t,  $J = 7.3$  Hz, 1H);  $^{13}\text{C}$  NMR (125 MHz,  $\text{CDCl}_3$ ): 18.8, 20.6, 23.2, 34.0, 40.4, 55.0, 70.5, 118.9, 125.3, 128.6, 133.5, 138.9, 147.5, 204.9; MS (EI, 70 eV,  $m/z$ ): 232 ( $\text{M}^+$ ); Elemental Analysis calcd. for  $\text{C}_{14}\text{H}_{16}\text{OS}$ : C, 72.37; H, 6.94; N, 0. Found: C, 72.36; H, 6.98; N, 0.; Melting Point: 161.0-163.5 °C.

**Physical properties of *trans*-6-chloro-9b-methyl-2,3,4a,9b-tetrahydro-1*H*-dibenzothiophene-4-one (2t)**

$^1\text{H}$  NMR (500 MHz,  $\text{CDCl}_3$ ): 1.15 (s, 3H), 2.08 (m, 1H), 2.17 (m, 1H), 2.25 (m, 1H), 2.38 (m, 1H), 2.46 (m, 1H), 2.55 (m, 1H), 4.66 (s, 1H), 6.95 (dd,  $J = 1.2, 7.3$  Hz, 1H), 7.05 (t,  $J = 7.6$  Hz, 1H), 7.18 (dd,  $J = 1.2, 7.6$  Hz, 1H);  $^{13}\text{C}$  NMR (125 MHz,  $\text{CDCl}_3$ ): 18.8, 23.0, 33.9, 40.3, 55.7, 70.3, 119.6, 126.5, 128.0, 149.5, 204.1; MS (EI, 70 eV,  $m/z$ ): 254 ( $\text{M}^+$ ,  $^{37}\text{Cl}$ ), 252 ( $\text{M}^+$ ,  $^{35}\text{Cl}$ ); Elemental Analysis calcd. for  $\text{C}_{13}\text{H}_{13}\text{OSCl}$ : C, 61.77; H, 5.18; N, 0. Found: C, 61.63; H, 5.32; N, 0.; Melting Point: 148.0 – 149.5 °C.

**Physical properties of *trans*-6-bromo-9b-methyl-2,3,4a,9b-tetrahydro-1*H*-dibenzothiophene-4-one (3t)**

$^1\text{H}$  NMR (500 MHz,  $\text{CDCl}_3$ ): 1.16 (s, 3H), 2.05 (m, 1H), 2.10 (m, 1H), 2.26 (m, 1H), 2.34 (m, 1H), 2.46 (m, 1H), 2.55 (m, 1H), 4.67 (s, 1H), 6.99 (m, 2H), 7.31 (dd,  $J = 2.4, 6.7$  Hz, 1H);  $^{13}\text{C}$  NMR (125 MHz,  $\text{CDCl}_3$ ): 18.9, 23.0, 34.0, 40.3, 56.1, 69.9, 118.2, 120.2, 126.6, 131.0, 141.7, 149.2, 204.1; MS (EI, 70 eV,  $m/z$ ): 298 ( $\text{M}^+$ ,  $^{81}\text{Br}$ ), 296 ( $\text{M}^+$ ,  $^{79}\text{Br}$ ); Elemental Analysis calcd. for  $\text{C}_{13}\text{H}_{13}\text{OSBr}$ : C, 52.54; H, 4.41; N, 0. Found: C, 52.44; H, 4.45; N, 0.; Melting Point: 129.0 – 130.5 °C.

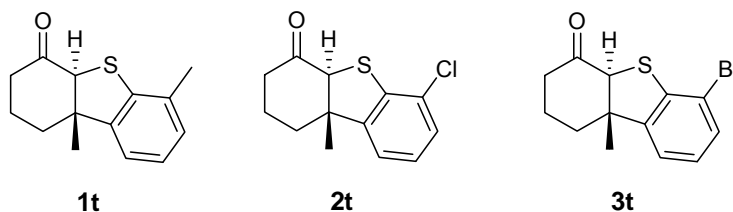

**Physical properties of *cis*-6,9b-dimethyl-2,3,4a,9b-tetrahydro-1*H*-dibenzothiophene-4-one (1c)**

<sup>1</sup>H NMR (500 MHz, CDCl<sub>3</sub>): 1.45 (s, 3H), 1.66 (m, 1H), 1.87 (m, 1H), 2.18 (s, 3H), 2.36 (m, 1H), 2.79 (m, 1H), 3.93 (s, 1H), 6.87 (d, *J* = 7.5 Hz, 1H), 7.00 (d, *J* = 7.5 Hz, 1H), 7.02 (t, *J* = 7.5 Hz, 1H); <sup>13</sup>C NMR (125 MHz, CDCl<sub>3</sub>): 20.5, 21.1, 25.8, 34.3, 37.5, 54.5, 64.4, 120.0, 125.4, 128.7, 132.2, 138.9, 145.9, 208.5; MS (EI, 70 eV, *m/z*): 232 (M<sup>+</sup>); Elemental Analysis calcd. for C<sub>14</sub>H<sub>16</sub>OS: C, 72.37; H, 6.94; N, 0. Found: C, 72.18; H, 7.15; N, 0.; Melting Point: 99.0 – 100.0 °C.

**Physical properties of *cis*-6-chloro-9b-methyl-2,3,4a,9b-tetrahydro-1*H*-dibenzothiophene-4-one (2c)**

<sup>1</sup>H NMR (500 MHz, CDCl<sub>3</sub>): 1.47 (s, 3H), 1.67 (m, 1H), 1.87 (m, 1H), 2.17 (m, 1H), 2.37 (m, 1H), 2.80 (m, 1H), 3.97 (s, 1H), 6.92 (dd, *J* = 1.1, 7.5 Hz, 1H), 7.08 (t, *J* = 7.5 Hz, 1H), 7.18 (dd, *J* = 1.1, 7.6 Hz, 1H); <sup>13</sup>C NMR (125 MHz, CDCl<sub>3</sub>): 21.0, 25.8, 34.4, 37.4, 64.8, 120.7, 126.6, 128.1, 148.0, 207.5; MS (EI, 70 eV, *m/z*): 254 (M<sup>+</sup>, <sup>37</sup>Cl), 252 (M<sup>+</sup>, <sup>35</sup>Cl); Elemental Analysis calcd. for C<sub>13</sub>H<sub>13</sub>OSCl: C, 61.77; H, 5.18; N, 0. Found: C, 61.71; H, 5.24; N, 0.; Melting Point: 65.0 – 66.0 °C.

**Physical properties of *cis*-6-bromo-9b-methyl-2,3,4a,9b-tetrahydro-1*H*-dibenzothiophene-4-one (3c)**

<sup>1</sup>H NMR (500 MHz, CDCl<sub>3</sub>): 1.46 (s, 3H), 1.66 (m, 1H), 1.87 (m, 1H), 2.18 (m, 1H), 2.37 (m, 1H), 2.80 (m, 1H), 3.97 (s, 1H), 6.99 (m, 2H), 7.33 (dd, *J* = 1.5, 7.3 Hz, 1H); <sup>13</sup>C NMR (125 MHz, CDCl<sub>3</sub>): 20.9, 25.9, 34.5, 37.4, 55.8, 63.6, 116.3, 121.2, 126.6, 131.0, 141.5, 147.6, 207.5; MS (EI, 70 eV, *m/z*): 298 (M<sup>+</sup>, <sup>81</sup>Br), 296 (M<sup>+</sup>, <sup>79</sup>Br); Elemental Analysis calcd. for C<sub>13</sub>H<sub>13</sub>OSBr: C, 52.54; H, 4.41; N, 0. Found: C, 52.65; H, 4.57; N, 0.; Melting Point: 73.0 – 74.0 °C.

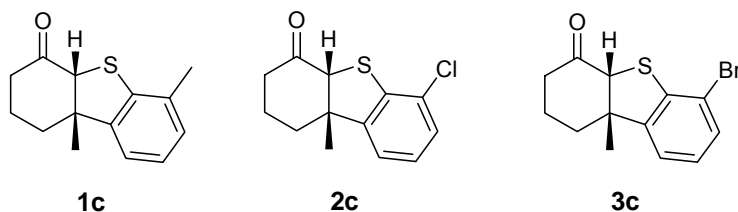

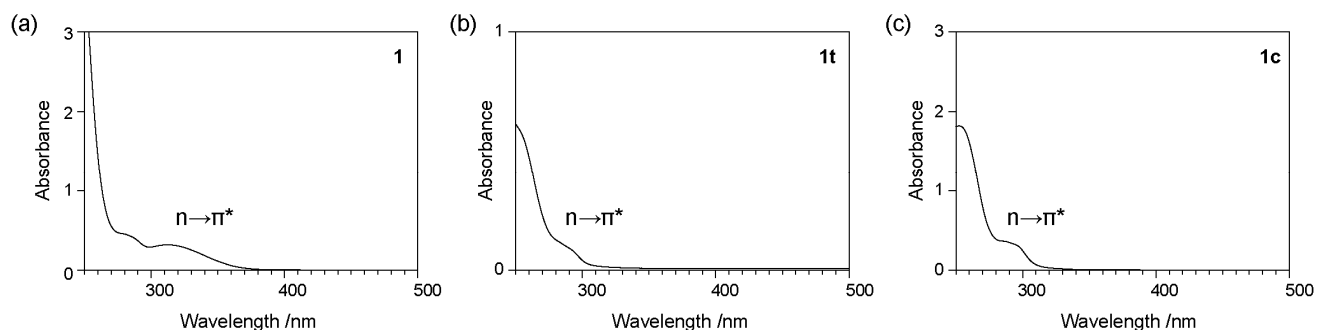

**Fig. S1** Typical UV/vis absorption spectra ( $\text{CH}_2\text{Cl}_2$ ) of (a) the reactant (**1**), (b) the *trans* isomer (**1t**) and (c) the *cis* isomer (**1c**).

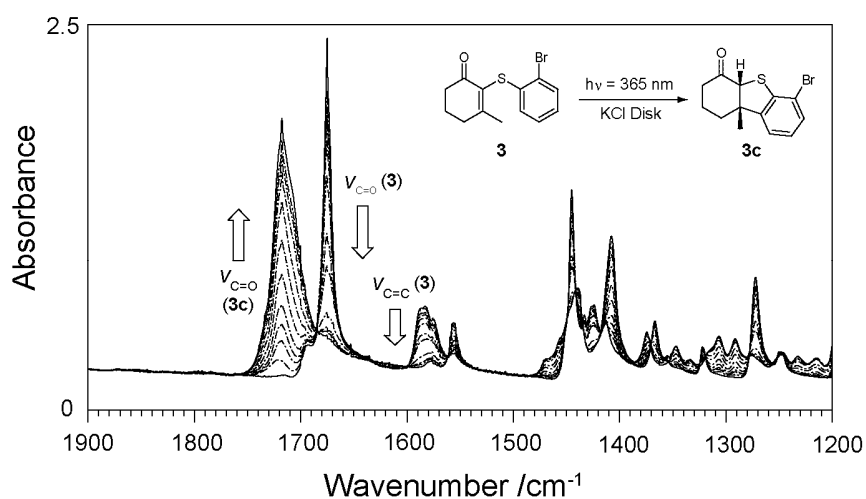

**Fig. S2** The change of IR spectra of **X(3)** in a KCl disk upon UV irradiation at rt. Reaction time: 0 – 960 s.

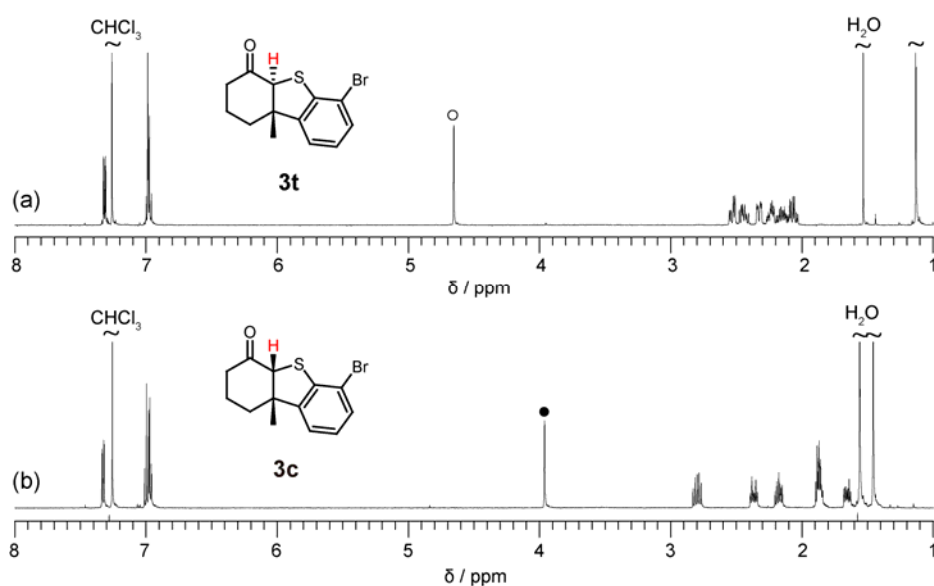

**Fig. S3** Typical <sup>1</sup>H NMR spectra (500 MHz, 293 K, CDCl<sub>3</sub>) of (a) the *trans* isomer (**3t**) and (b) the *cis* isomer (**3c**). (●) and (○) denote the methine proton of **3t** and the methine proton of **3c**, respectively.

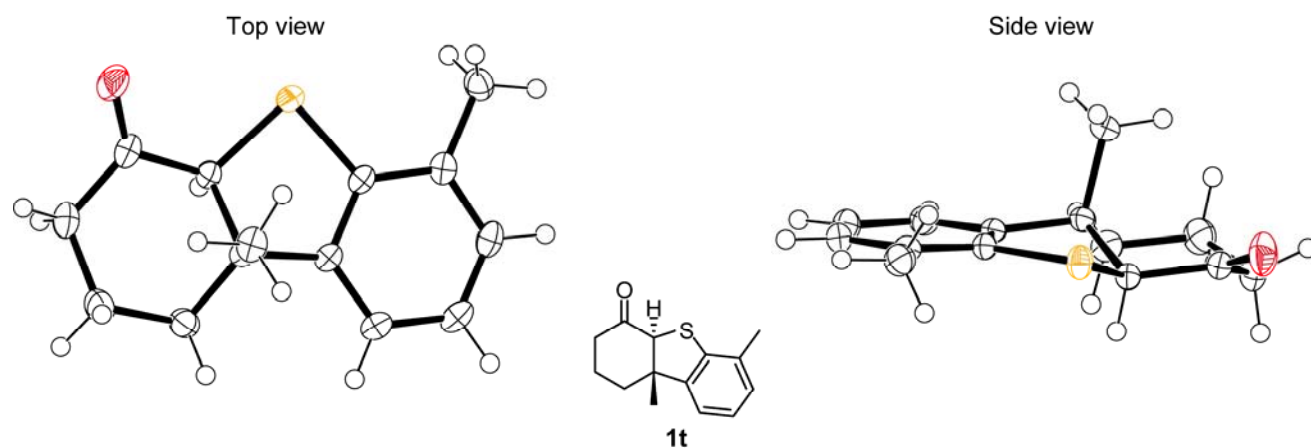

**Fig. S4** ORTEP drawing (50 % probability ellipsoids) of top (left) and side (right) views of **1t**. Colour scheme: black (carbon), black (hydrogen), red (oxygen), orange (sulphur).

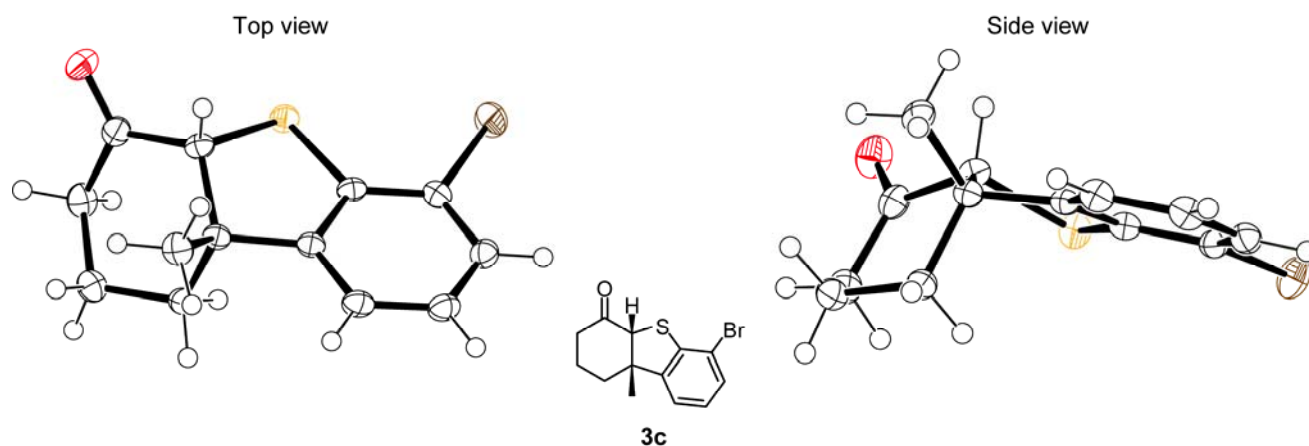

**Fig. S5** ORTEP drawing (50 % probability ellipsoids) of top (left) and side (right) views of **3c**. Colour scheme: black (carbon), black (hydrogen), red (oxygen), orange (sulphur), brown (bromine).

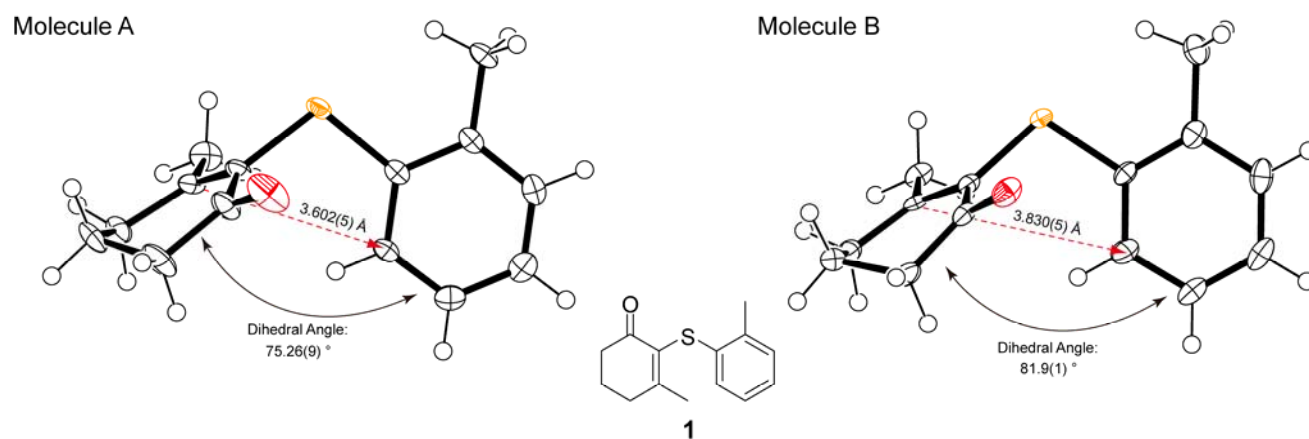

**Fig. S6** ORTEP drawing (50 % probability ellipsoids) of the two independent molecules (Molecule A and B) of **1** in **X(1)**. Colour scheme: black (carbon), black (hydrogen), red (oxygen), orange (sulphur).

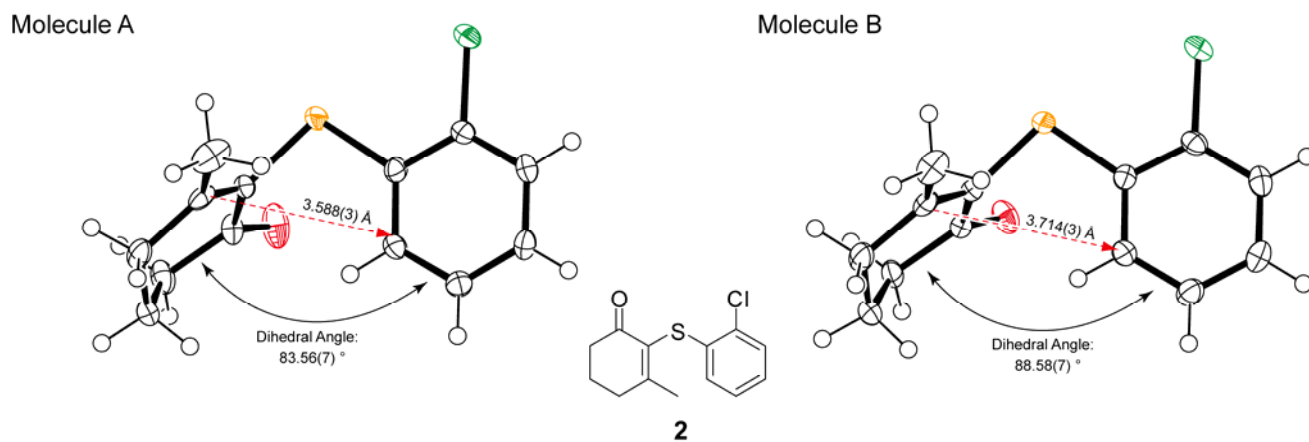

**Fig. S7** ORTEP drawing (50 % probability ellipsoids) of the two independent molecules (Molecule A and B) of **2** in **X(2)**. Colour scheme: black (carbon), black (hydrogen), red (oxygen), orange (sulphur), green (chlorine).

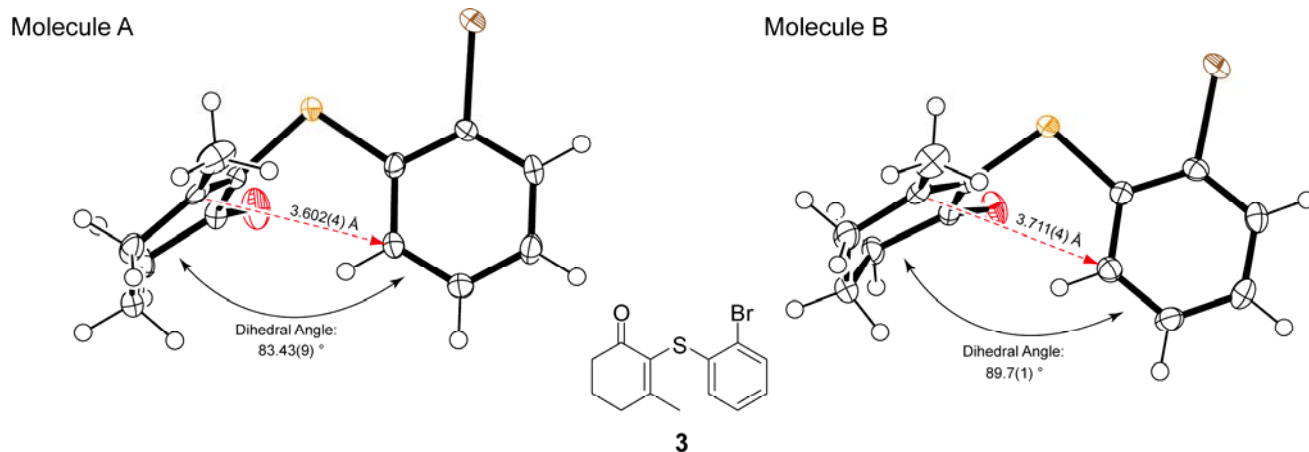

**Fig. S8** ORTEP drawing (50 % probability ellipsoids) of the two independent molecules (Molecule A and B) of **3** in **X(3)**. Colour scheme: black (carbon), black (hydrogen), red (oxygen), orange (sulphur), brown (bromine).

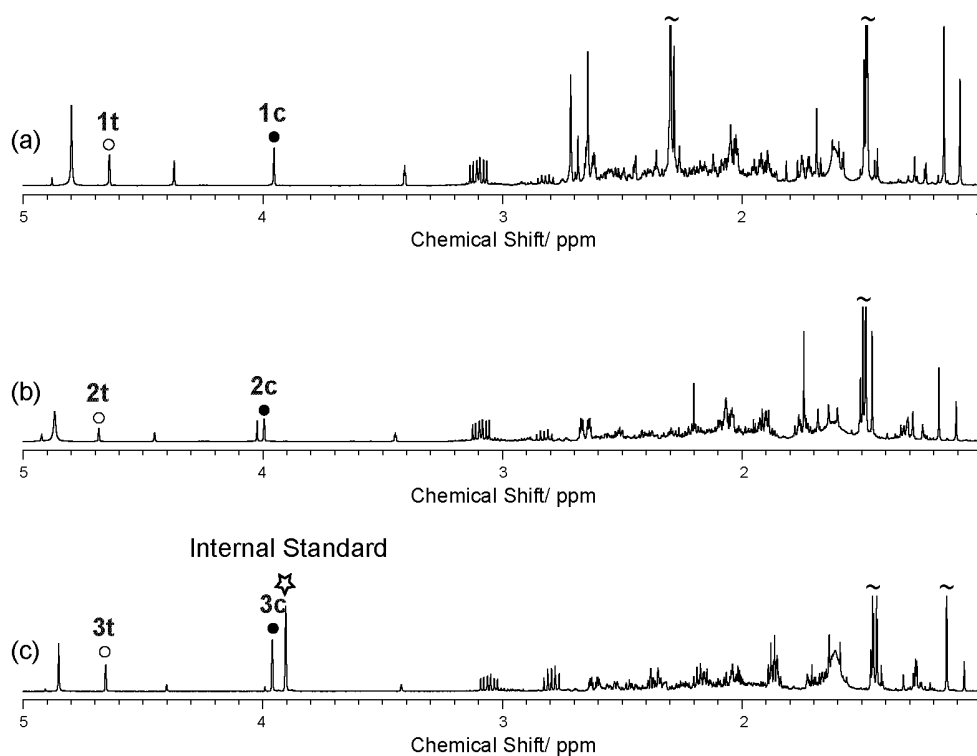

**Fig. S9** Photochemical reaction products of (a) compound **1**, (b) compound **2** and (c) compound **3** in degassed benzene solution after UV irradiation ( $\lambda = 365$  nm) for 2.0 h. (●) and (○) denote the *cis* and the *trans* isomers, respectively.

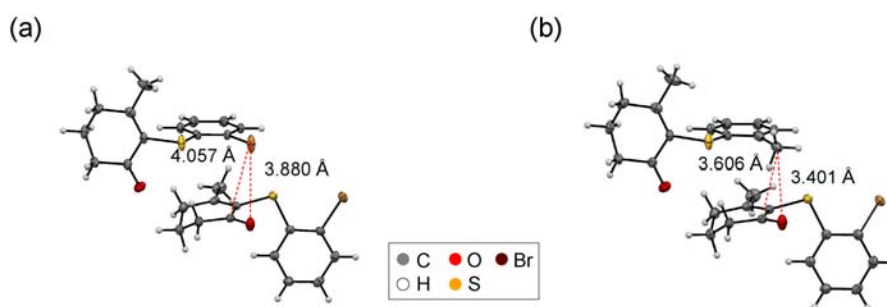

**Fig. S10** Intermolecular carbonyl-Br (a) and carbonyl-Me (b) contacts found in **X(3)** and **X<sub>3</sub>(1:3=1:9)**, respectively.

There are two independent molecules in crystals **X(3)** and **X<sub>3</sub>(1:3=1:9)**. Contacts for one molecule are shown in Fig. 3 and those for the other are shown in this Figure.

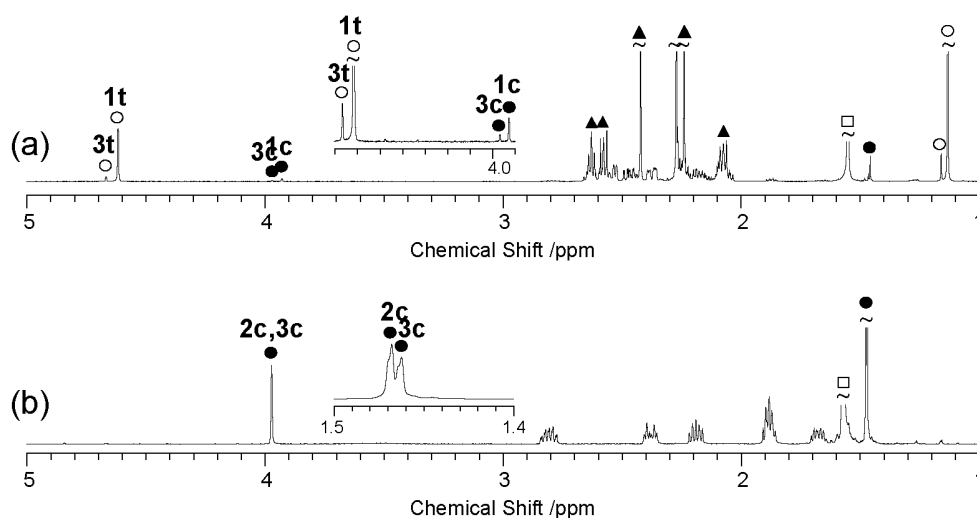

**Fig. S11** The photochemical reaction products after UV irradiation for 0.5 h on single crystals of  $\text{X}_3(1:3=9:1)$  (a) and  $\text{X}_3(2:3=1:1)$  (b). (●), (○), (▲) and (□) denote the *cis* isomer, the *trans* isomer, the reactant and  $\text{H}_2\text{O}$ , respectively.

## References

- 1 A. G. Schultz, W. Y. Fu, R. D. Lucci, B. G. Kurr, K. M. Lo and M. Boxer, *J. Am. Chem. Soc.*, 1978, **100**, 2140.
- 2 G. M. Sheldrick, A short history of SHELX, *Acta. Cryst.* 2008, **A64**, 112.
- 3 See: <http://www.ccdc.cam.ac.uk/products/mercury/>
